# Supplementary material
Source: HighWire-hosted journal article supplement (https://bjo.bmj.com/content/suppl/2007/04/10/89.10.1293)
Supplement: 89101293germantranslation.pdf [file 89101293germantranslation.pdf]

# Wirkung von Dorzolamid und Timolol auf die okuläre Durchblutung bei Patienten mit primärem Offenwinkelglaukom und okulärer Hypertension

G Fuchsjäger-Mayrl, B Wally, G Rainer, W Buehl, T Aggermann, J Kolodjaschna, G Weigert, E Polska, H-G Eichler, C Vass, L Schmetterer

Br J Ophthalmol 2005;89: 1293-1297. doi: 10.1136/bjo.2005.067637

**Zweck:** Es liegen Hinweise dafür vor, dass Veränderungen in der Durchblutung der Papille an der Pathogenese des Glaukoms beteiligt sind. Es besteht daher ein wesentliches Interesse an der Untersuchung der Wirkungen von topischen Antiglaukommedikamenten auf die okuläre Durchblutung. Die vorliegende Studie sollte die okulären hämodynamischen Wirkungen von Dorzolamid und Timolol bei Patienten mit primärem Offenwinkelglaukom (POWG) und okulärer Hypertension (OHT) vergleichen.

**Methoden:** Es wurden 140 Patienten mit primärem Offenwinkelglaukom oder okulärer Hypertension in eine kontrollierte, randomisierte, doppelblinde Studie mit zwei Parallelgruppen aufgenommen. Siebzug Patienten wurden für eine Behandlung mit Timolol und 70 Patienten für eine Behandlung mit Dorzolamid für jeweils 6 Monate randomisiert. Patienten, deren Augeninnendruck (IOD [Intraokularer Druck]) auf eine der beiden Therapien nicht ansprach, wurden nach 2 Wochen auf die jeweils andere Therapie umgestellt. Die Messung des Blutflusses im temporalen neuroretinalen Randsaum und in der Exkavation der Papille erfolgte mittels Scanning-Laser-Doppler-Flowmetrie. Der pulsatile choroidale Blutfluss wurde mittels laserinterferometrischer Messung der Funduspulsationsamplitude bestimmt.

**Ergebnisse:** Fünf Patienten sprachen auf Timolol nicht an und wurden auf Dorzolamid umgestellt, und 18 Patienten wechselten von Dorzolamid auf Timolol. Die Wirkungen beider Medikamente auf den Augeninnendruck und den okulären Perfusionsdruck waren vergleichbar. Dorzolamid erhöhte den Blutfluss im temporalen neuroretinalen Randsaum ( $8,5 \pm 1,6 \%$ ,  $p < 0,001$  versus Timolol) und in der Exkavation der Papille ( $13,5 \pm 2,5 \%$ ,  $p < 0,001$  versus Timolol) sowie die Funduspulsationsamplitude ( $8,9 \pm 1,3 \%$ ,  $p < 0,001$  versus Timolol), Timolol hingegen nicht.

**Schlussfolgerungen:** Die vorliegende Studie zeigt eine Erhöhung der Durchblutung der Papille und der Choroidea nach 6 Monaten Behandlung mit Dorzolamid, jedoch nicht mit Timolol. Es bleibt zu klären, ob diese Wirkung bei der Reduktion des Gesichtsfeldausfalls bei Glaukopatienten helfen kann.

Autorenzugehörigkeit am Ende des Artikels

Korrespondenzautor:  
Dr. L. Schmetterer  
Universitätsklinik für  
Klinische Pharmakologie,  
Währinger Gürtel 18-20,  
A-1090 Wien, Österreich;  
Leopold.  
Schmetterer@meduniwien  
.ac.at

Annahme zur Publikation  
am 1. April 2005

Es liegen zunehmende Hinweise dafür vor, dass Veränderungen des okulären Blutflusses an der Pathogenese des Glaukoms beteiligt sind.<sup>1</sup> Es besteht daher wesentliches Interesse an der Bestimmung der potenziellen Effekte der derzeit verfügbaren Antiglaukommedikamente auf die okuläre Hämodynamik. Es wurden bereits zahlreiche klinische Studien zur Klärung dieser Frage durchgeführt. Dabei wurden unterschiedliche Methoden und Techniken zur Bestimmung des okulären Blutflusses eingesetzt und es wurden teilweise widersprüchliche Ergebnisse beschrieben.<sup>2</sup> Allerdings war an vielen der veröffentlichten Studien nur eine geringe Zahl von Patienten beteiligt.

Wir untersuchten die okulären hämodynamischen Wirkungen von Dorzolamid versus Timolol an einer großen Zahl von Patienten mit Glaukom und okulärer Hypertension (OHT). Dorzolamid wurde aufgrund vorhergehender Berichte gewählt, die bestätigten, dass dieses Arzneimittel die okuläre Durchblutung steigern könnte,<sup>3-9</sup> wobei allerdings nicht alle Studien positive Ergebnisse erbrachten.<sup>10-12</sup> Timolol wurde als Kontrolle gewählt, weil die drucksenkende Wirkung dieses Betablockers jener von Dorzolamid nur geringfügig überlegen ist<sup>13</sup> und vergleichbare Effekte auf den okulären Perfusionsdruck erwartet werden können.

Der Blutfluss in der Papille wurde mittels Scanning-Laser-Doppler-Flowmetrie (SLDF) gemessen<sup>14</sup> und der pulsatile choroidale Blutfluss wurde mittels laserinterferometrischer Messung der Pulsamplitude am Fundus bestimmt.<sup>15</sup>

## METHODEN

### Patienten

Nach Genehmigung durch die Ethikkommission der Medizinischen Fakultät der Universität Wien wurden 140 Patienten mit primärem Offenwinkelglaukom (POWG) oder okulärer Hypertension (OHT) in die Studie eingeschlossen. Zur Berechnung der Stichprobengröße, die auf den Reproduzierbarkeitsdaten des Heidelberg-Retina-Flowmeter beruhte (Standardabweichung von 32 %, berechnet anhand monatlicher Messungen bei Patienten mit POWG über 6 Monate, unveröffentlichte Daten), wurde ein ANOVA-Modell für wiederholte Messungen eingesetzt und ein  $\alpha$ -Niveau von 0,05 und ein  $\beta$ -Niveau von 0,2 gewählt. Unterschiede von weniger als 10 % zwischen den Behandlungsgruppen wurden als klinisch nicht relevant erachtet. Die Berechnung der Stichprobengröße erbrachte daher eine Gesamtzahl von 127 Patienten. Ursprünglich wurde eine Dropout-Rate von 20 % erwartet und es wurden daher 160 Patienten vorgesehen. Da sich zeigte, dass die Dropout-Rate geringer war, wurden nur 140 Patienten eingeschlossen. Die Variabilität der topischen Messung der Funduspulsations-

**Abkürzungen:** FPA, Funduspulsationsamplitude; HRF, Heidelberg Retina Flowmeter; IOD, Intraokularer Druck; OHT, okuläre Hypertension; ONH, Papille; OPD, okulärer Perfusionsdruck; POWG, primäres Offenwinkelglaukom; SLDF, Scanning-Laser-Doppler-Flowmetrie

amplitude ist gering und wurde daher bei unserer Stichprobengrößenberechnung nicht berücksichtigt.

Die Ausgangscharakteristika dieser Patienten wurden bereits zuvor ausführlich beschrieben.<sup>16</sup> Die Einschlusskriterien waren entweder das Vorliegen eines POWG oder einer OHT mit einem unbehandelten Augeninnendruck (IOD)  $\geq 21$  mmHg in mindestens einem Auge. Dieser IOD musste bei zumindest 3 zu verschiedenen Zeitpunkten durchgeführten Messungen verifiziert worden sein. Für alle Patienten war eine Auswaschphase von 2 Wochen für die vorhergehende Antiglaukomtherapie vorgesehen. Bei Vorliegen eines der folgenden Kriterien war ein Patient von einer Teilnahme an der Studie ausgeschlossen: Exfoliationsglaukom, Pigmentdispersionsglaukom, Krankengeschichte mit akutem Winkelblock, mittlere Abweichung (Mean Deviation [MD]) bei Gesichtsfelduntersuchung (Programm Humphrey 30-2)  $> 12$ , intraokulare Operation oder Argon-Laser-Trabekuloplastik innerhalb der letzten 6 Monate, okuläre Entzündung oder Infektion innerhalb der letzten 3 Monate, Bradykardie (Herzfrequenz  $< 50$  Schläge/Minute), AV-Block zweiten oder dritten Grades, Asthma bronchiale, chronisch-obstruktive Atemwegserkrankung, kongestive Herzinsuffizienz, schwere Nierenfunktionsbeeinträchtigung (Kreatinin-Clearance  $< 1,8$  l/h), bekannte Überempfindlichkeit gegenüber einem der Studienmedikamente oder gegenüber Medikamenten mit ähnlicher chemischer Struktur, Krankengeschichte mit Nichtansprechen des Augeninnendrucks auf topische Betablocker oder topische Karboanhydrasehemmer sowie bestehende Schwangerschaft.

Die Unterscheidung zwischen Patienten mit POWG und OHT beruhte auf den Kriterien der Ocular Hypertension Treatment Study.<sup>17</sup> Ein abnormales Gesichtsfeld war definiert als Ergebnis außerhalb der Grenzen der Normalwerte im Glaucoma Hemifield-Test und/oder eine Corrected Pattern Standard Deviation (CPSD) mit  $p < 0,05$ .

### Studienprotokoll

Die Studie wurde mit einem randomisierten, doppelblinden Studiendesign mit Parallelgruppen durchgeführt. Die Patienten erhielten entweder Timolol zweimal täglich (Timoptic, MSD) oder Dorzolamid (Trusopt, MSD) dreimal täglich für 6 Wochen. Um doppelblinde Bedingungen sicherzustellen, erhielten die Patienten in der Timolol-Gruppe ein Fläschchen mit identem Aussehen zur Anwendung zur Mittagszeit. Der Studienablauf ist in Abbildung 1 dargestellt. Während der 2 Wochen vor Beginn der Studie wurden die Patienten auf Erfüllung aller Teilnahmebedingungen überprüft und wie oben beschrieben untersucht. Falls zumindest ein Auge der Patienten die Teilnahmebedingungen erfüllte, wurde ein Termin für einen Baseline-Besuch festgelegt. Wenn möglich, wurden beide Augen mit der Studienmedikation behandelt. Falls dies nicht möglich war, wurde das andere Auge nach klinischen

Erfordernissen behandelt. Beim Baseline-Besuch wurden alle Parameter in der Zeit zwischen 08:00 und 12:00 Uhr bestimmt.

Die Patienten mussten 2 Wochen nach dem Baseline-Besuch wieder in die Klinik kommen. Bei diesem Besuch wurden die Patienten in Patienten mit und ohne Ansprechen des IOD aufgeteilt. Als Patienten mit Ansprechen wurden alle Patienten mit einem IOD von  $\leq 19$  mmHg oder mit einer IOD-Senkung im Index-Auge um  $\geq 25$  % gegenüber dem Baseline-IOD definiert und diese Patienten setzten die Studie wie vorgesehen fort. Patienten ohne Ansprechen oder Patienten, die die Studienmedikation nicht vertrugen, wurden auf die jeweils andere Behandlung umgestellt und für diese Patienten wurde zwei Wochen nach diesem Besuch ein Termin für einen weiteren Besuch festgelegt. Beim Besuch zwei Wochen nach der Umstellung der Medikation wurden diese Patienten wiederum in Patienten mit und ohne Ansprechen aufgeteilt. Patienten, die auf beide Medikationen nicht ansprechen, wurden aus der Studie genommen. Bei den Patienten, die auf die zweite Antiglaukommedikation ansprechen, wurde die Studie wie vorgesehen fortgesetzt.

Drei Monate sowie 6 Monate nach dem Baseline-Besuch waren weitere Besuche vorgesehen. Bei diesen Besuchen wurden alle hämodynamischen Parameter und der IOD bestimmt. Beim letzten Besuch wurden eine neuerliche Gesichtsfelduntersuchung und eine Augenuntersuchung durchgeführt. Für die Besuche nach 2 Wochen wurde eine Abweichung von  $\pm 3$  Tagen akzeptiert und für die anderen Besuche eine Abweichung von  $\pm 1$  Woche.

Die Studie wurde an der Universitätsklinik für Klinische Pharmakologie und an der Universitätsklinik für Augenheilkunde am Allgemeinen Krankenhaus Wien durchgeführt.

### Messungen

#### Scanning-Laser-Doppler-Flowmetrie

Die Scanning-Laser-Doppler-Flowmetrie wurde mithilfe des Heidelberg-Retina-Flowmeter durchgeführt (HRF, Heidelberg Engineering, Heidelberg, Deutschland). Das HRF ist ein konfokales Scanning-Laser-Ophthalmoskop, das auf den Prinzipien der Laser-Doppler-Flowmetrie beruht. Daher können die mittlere Geschwindigkeit der Erythrozyten (vel), das Blutvolumen (vol) und der Blutfluss in relativen Einheiten für jeden Bildpunkt berechnet werden.<sup>18</sup> In der vorliegenden Studie wurden ein Bereich von  $10 \times 10$  Pixel ( $100 \times 100 \mu\text{m}$ ) in der Exkavation der Papille (CupBF) und ein Bereich von  $20 \times 20$  Pixel am temporalen neuroretinalen Randsaum (RimBF) für die Berechnung der hämodynamischen Parameter gewählt. Die Auswahl der Messbereiche beruhte auf der von Nicoleta *et al* beschriebenen Methode.<sup>19</sup> Der neuroretinale Randsaum wurde anhand von Bildern gemessen, die auf die oberflächliche Retina fokussiert waren, und die Exkavation der Papille anhand von Bildern, die auf die Lamina cribrosa fokussiert waren. Die Messungen wurden in Arealen ohne größere oberflächliche Gefäße durchgeführt.

Die Reproduzierbarkeit ist bei Scanning-Laser-Doppler-Flowmetrie ein entscheidendes Kriterium.<sup>20, 21</sup> Es wurden daher mindestens zwei Messungen gemacht und der Mittelwert der beiden Werte für die besten Bilder wurde errechnet. Es wurden nur Messwerte mit einem Variationskoeffizienten von weniger als 20 % in die Analyse aufgenommen.

#### Laserinterferometrische Funduspulsationsmessung

Pulssynchrone Pulsationen des Augenhintergrunds wurden mittels Laserinterferometrie wie von Schmetterer *et al* im Detail beschrieben<sup>15</sup> gemessen. Das Auge wird durch einen Laserstrahl beleuchtet, der sowohl an der Vorderoberfläche der Kornea als auch am Augenhintergrund reflektiert wird. Die beiden reflektierten Wellen produzieren Interferenzringe, aus denen die Veränderungen der Entfernung zwischen

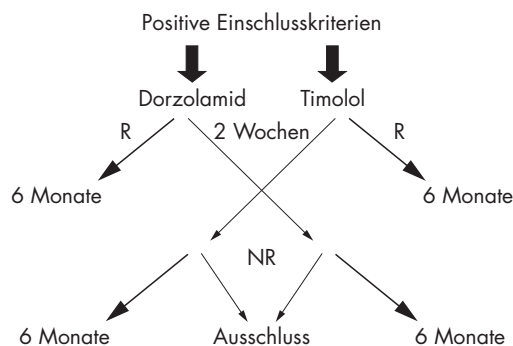

**Abbildung 1** Diagramm des Studienablaufs (R= Patienten mit Ansprechen des IOD; NR = Patienten ohne Ansprechen des IOD).

**Tabelle 1** Charakteristika der Studienpopulation

|                                   | POWG                   | OHT                   |
|-----------------------------------|------------------------|-----------------------|
| Anzahl                            | 49                     | 91                    |
| Alter                             | 63,0 ± 13,5            | 61,2 ± 13,3           |
| Männlich/weiblich                 | 19/30                  | 48/43                 |
| Augeninnendruck (mmHg)            | 22,6 ± 2,9             | 23,2 ± 3,8            |
| Systolischer Blutdruck (mmHg)     | 141,0 ± 15,8           | 142,8 ± 17,8          |
| Diastolischer Blutdruck (mmHg)    | 75,7 ± 10,1            | 74,8 ± 11,9           |
| Okulärer Perfusionsdruck (mmHg)   | 39,0 ± 7,2             | 40,6 ± 9,0            |
| Pulsfrequenz (min <sup>-1</sup> ) | 78,1 ± 12,5            | 78,0 ± 11,6           |
| Mittlere Abweichung               | -1,58 (-11,09 – +2,83) | -0,16 (-5,35 – +4,10) |
| Vertikale C/D Ratio               | 0,75 ± 0,11            | 0,59 ± 0,12           |
| Horizontale C/D Ratio             | 0,77 ± 0,11            | 0,62 ± 0,11           |
| Papillenfläche (mm <sup>2</sup> ) | 1,58 ± 0,37            | 1,46 ± 0,34           |
| Blutfluss im Randsaum (a.u.)      | 287 ± 51               | 333 ± 111             |
| Blutfluss in Exkavation (a.u.)    | 192 ± 71               | 212 ± 101             |
| Funduspulsationsamplitude (µm)    | 3,0 ± 0,8              | 3,3 ± 0,9             |

C/D Ratio, Cup to Disc Ratio  
 Daten sind als Mittelwerte ± Standardabweichung angegeben mit Ausnahme der mittleren Abweichung, für die der Medianwert (Bereich) angegeben ist.

Kornea und Retina während eines Herzzyklus berechnet werden können. Die maximale Veränderung dieser Entfernung wird als Funduspulsationsamplitude (FPA) bezeichnet und stellt einen Schätzwert des pulsatilem choroidalen Blutflusses dar.<sup>22, 23</sup> Es wurden auch in diesem Fall zwei Messungen durchgeführt und der Mittelwert wurde errechnet. FPA-Werte mit einem Variationskoeffizienten von mehr als 20% wurden in der Analyse nicht berücksichtigt.

**Gesichtsfelduntersuchung**

Die Gesichtsfelduntersuchungen wurden mit dem Humphrey Field Analyzer (Full Threshold Program 30-2) durchgeführt. Alle Patienten waren bereits mit Gesichtsfelduntersuchungen vertraut und hatten bereits mindestens 3 solche Unter-

suchungen gehabt, davon zumindest eine innerhalb der letzten 3 Monate vor Beginn der Studie. Alle Messungen wurden von einem erfahrenen Techniker überwacht. Die Einschlusskriterien für die Gesichtsfelduntersuchungen waren weniger als 33 % falsch-positive Ergebnisse, weniger als 33 % falsch-negative Ergebnisse und weniger als 33 % Fixationsausfälle.

**Nicht-invasive Messung der systemischen Hämodynamik**

Systolischer und diastolischer Blutdruck (SBD, DBD) wurden mit einem automatischen oszillometrischen Blutdruckmessgerät am Oberarm gemessen. Der mittlere Arteriendruck (MAD) wurde als 1/3 SBD + 2/3 DBD errechnet. Die Pulsfrequenz wurde automatisch mit einem Finger-Pulsmessgerät (HP-CMS Patient Monitor, Hewlett Packard, Palo Alto, Ca, USA) aufgezeichnet. Der okuläre Perfusionsdruck wurde als 2/3 \* MAD – IOD errechnet.

**Datenanalysen**

Zur Bewertung der Wirkungen von Dorzolamid versus Timolol wurde eine zwei-faktorielle ANOVA für wiederholte Messungen eingesetzt. Patienten, die nur den Baseline-Besuch absolvierten, wurden nicht in die Analyse eingeschlossen. Bei allen Patienten, die die Studie nicht vollständig abschlossen, aber zumindest den Besuch nach zwei Wochen absolvierten, wurden die zuletzt erhobenen Messwerte weitergeführt. Das bedeutet, dass die Daten vom letzten tatsächlich absolvierten Besuch als Ersatz für alle weiteren fehlenden Dateneinträge verwendet wurden. Bei Patienten, die nicht auf die Medikation ansprachen, für die sie ursprünglich randomisiert worden waren und auf die jeweils andere Therapie umgestellt wurden, wurden die Werte vor Behandlungsbeginn als Baseline-Werte herangezogen. In diesen Fällen wurden die beim Besuch nach zwei Wochen erhobenen Werte nicht in die Analyse aufgenommen. Zusätzlich wurde eine multiple

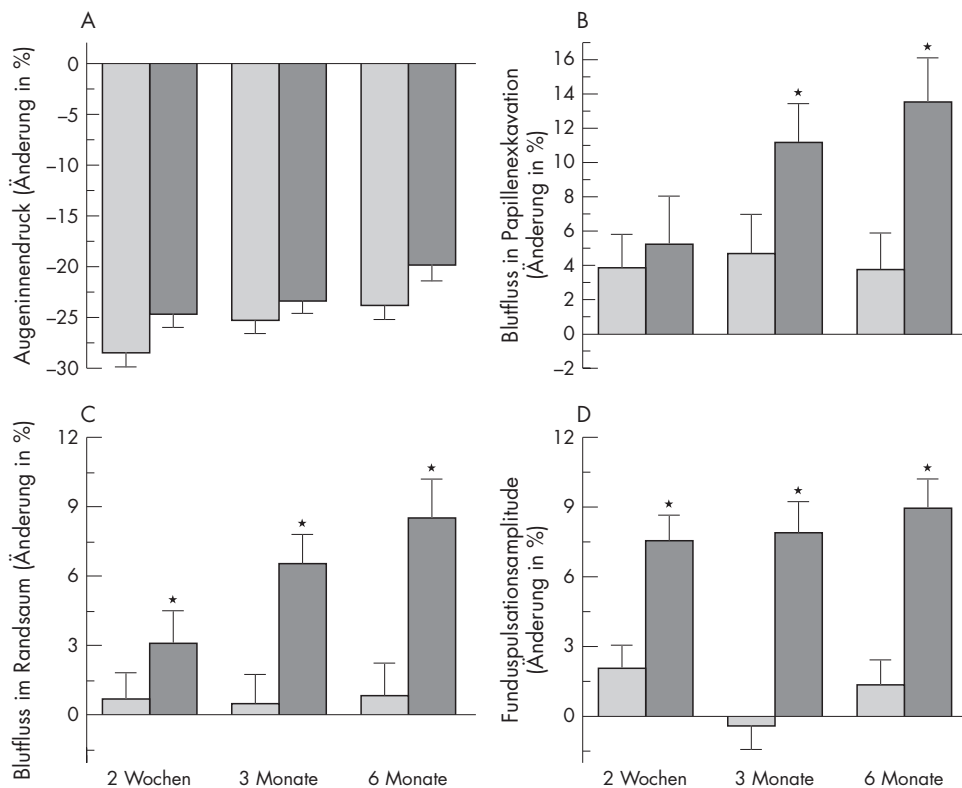

**Abbildung 2** Wirkungen von Dorzolamid (dunkelgraue Balken) und Timolol (hellgraue Balken) auf den Augeninnendruck (IOD) (A), Blutfluss in Papillenexkavation (B), Blutfluss im Randsaum (C) und Funduspulsationsamplitude (D). Daten sind als Mittelwerte ± Standardabweichung dargestellt. Sternchen zeigen signifikante Wirkungen von Dorzolamid versus Timolol.

**Tabelle 2** Wirkungen von Dorzolamid und Timolol auf Blutdruck und Pulsfrequenz

|                                   | Baseline     | 2 Wochen     | 3 Monate     | 6 Monate     |
|-----------------------------------|--------------|--------------|--------------|--------------|
| <b>Timolol</b>                    |              |              |              |              |
| Systolischer Blutdruck (mmHg)     | 142,1 ± 16,5 | 140,7 ± 19,2 | 137,4 ± 20,7 | 134,3 ± 24,1 |
| Diastolischer Blutdruck (mmHg)    | 75,3 ± 9,5   | 73,6 ± 9,9   | 73,0 ± 10,3  | 75,6 ± 11,7  |
| Okulärer Perfusionsdruck (mmHg)   | 39,3 ± 7,4   | 41,3 ± 7,6   | 40,0 ± 6,3   | 41,0 ± 8,3   |
| Pulsfrequenz (min <sup>-1</sup> ) | 76,8 ± 12,0  | 75,9 ± 12,0  | 73,4 ± 11,8  | 73,4 ± 11,7  |
| <b>Dorzolamid</b>                 |              |              |              |              |
| Systolischer Blutdruck (mmHg)     | 142,3 ± 18,1 | 140,7 ± 21,4 | 136,8 ± 19,5 | 138,1 ± 17,9 |
| Diastolischer Blutdruck (mmHg)    | 75,0 ± 13,7  | 75,6 ± 12,4  | 72,8 ± 11,6  | 71,4 ± 11,8  |
| Okulärer Perfusionsdruck (mmHg)   | 39,0 ± 8,3   | 41,8 ± 9,3   | 40,6 ± 8,4   | 39,4 ± 8,3   |
| Pulsfrequenz (min <sup>-1</sup> ) | 79,9 ± 12,0  | 82,1 ± 13,3  | 81,2 ± 12,9  | 79,2 ± 13,4  |

Daten sind als Mittelwerte ± Standardabweichung angegeben.

Regressionsanalyse mit schrittweiser Aufnahme der prädiktiven Variablen (Reihenfolge der Aufnahme siehe Tabelle 3) durchgeführt, um die potenziell bestimmenden Faktoren für die durch Dorzolamid und Timolol bedingten Veränderungen der Blutflussparameter gegenüber Baseline zu charakterisieren. Die Daten werden als Mittelwerte ± Standardabweichung (SD) dargestellt. Als Signifikanzniveau wurde  $p = 0,05$  gewählt.

## ERGEBNISSE

Die Baseline-Charakteristika der Studienpopulation wurden bereits in einem vorhergehenden Bericht<sup>16</sup> beschrieben und werden in Tabelle 1 kurz zusammengefasst.

Drei Patienten erschienen nur zum Baseline-Besuch und wurden in der Analyse nicht berücksichtigt. Fünf Patienten sprachen auf Timolol nicht an und wurden nach den ersten zwei Wochen Behandlung auf Dorzolamid umgestellt. Bei 18 Patienten zeigte sich kein ausreichendes Ansprechen des IOD auf Dorzolamid oder die Behandlung wurde nicht vertragen und diese Patienten wurden auf Timolol umgestellt. Die Rate der Therapieversager aufgrund von unzureichender IOD Kontrolle oder aufgrund von Nebenwirkungen war in der Dorzolamid-Gruppe signifikant höher als in der Timolol-Gruppe ( $p < 0,001$ ). Nach Umstellung auf die jeweils andere Therapie zeigten alle Patienten eine zufriedenstellende IOD Kontrolle und kein einziger Patient musste in dieser Phase aus der Studie ausgeschlossen werden.

Nach den Besuchen nach zwei Wochen und drei Monaten konnten 7 bzw. 5 Patienten nicht mehr weiter nachbeobachtet werden. Für diese 12 Patienten wurden die zuletzt erhobenen Werte weitergeführt. Die Prüfmedikamente hatten keinen Einfluss auf Blutdruck oder Pulsfrequenz (SBD:  $p = 0,823$  zwischen den Gruppen; DBD:  $p = 0,644$  zwischen den Gruppen; Pulsfrequenz:  $p = 0,511$  zwischen den Gruppen, Tabelle 2). Der Baseline-IOD war in beiden Gruppen

vergleichbar (Timolol:  $23,0 \pm 3,1$  mmHg; Dorzolamid:  $22,8 \pm 3,3$  mmHg). Die Senkung des IOD (Abbildung 2) war mit Dorzolamid und Timolol vergleichbar ( $p = 0,32$ ). Beim Besuch nach sechs Monaten betrug die Senkung des IOD mit Timolol  $23,8 \pm 1,4$  % und mit Dorzolamid  $19,9 \pm 1,6$  %. Der okuläre Perfusionsdruck zeigte daher in beiden Gruppen eine Tendenz zu einer Erhöhung in einem ähnlichen Ausmaß ( $p = 0,912$  zwischen den Gruppen; Tabelle 2). Alle okulären hämodynamischen Parameter erhöhten sich unter Behandlung mit Dorzolamid, während sie sich unter Behandlung mit Timolol nicht veränderten (Abbildung 2). Dieser Unterschied war signifikant für den Blutfluss in der Papillenexkavation (CupBF) ( $p < 0,001$ ), den Blutfluss im neuroretinalen Randsaum (RimBF) ( $p < 0,001$ ) und die Funduspulsationsamplitude (FPA) ( $p < 0,001$ ). Nach sechs Monaten Behandlung hatte sich unter Dorzolamid der Blutfluss in der Papillenexkavation um  $13,5 \pm 2,5$  %, der Blutfluss im neuroretinalen Randsaum um  $8,5 \pm 1,6$  % und die Funduspulsationsamplitude um  $8,9 \pm 1,3$  % erhöht, während unter Timolol keine Wirkung festgestellt wurde.

Die Ergebnisse der multiplen Regressionsanalyse sind aus Tabelle 3 ersichtlich. Die Erhöhung der okulären hämodynamischen Parameter unter Behandlung mit Dorzolamid war unabhängig von der Senkung des IOD und unabhängig vom IOD bei Baseline. Zusätzlich war die Erhöhung bei Patienten mit POWG und bei jenen mit OHT vergleichbar und wurde durch keine der anderen gemessenen Variablen beeinflusst. Nach 6 Monaten Behandlung mit Timolol oder Dorzolamid waren die Gesichtsfeldparameter unverändert (Daten nicht dargestellt).

## DISKUSSION

Die vorliegende Studie zeigt, dass eine 6-monatige Behandlung mit Dorzolamid, jedoch nicht mit Timolol, mit einer Erhöhung des okulären Blutflusses verbunden ist. Dies konnte

**Tabelle 3** P-Werte der multiplen Regressionsanalyse für Dorzolamid-bedingte Veränderungen der okulären hämodynamischen Parameter und andere erhobene Parameter

|                                                              | RimBF | CupBF | FPA  |
|--------------------------------------------------------------|-------|-------|------|
| POWG/Hypertension                                            | 0,52  | 0,60  | 0,59 |
| % Veränderung des okulären Perfusionsdrucks (nach 6 Monaten) | 0,28  | 0,40  | 0,25 |
| % Veränderung des IOD (nach 6 Monaten)                       | 0,20  | 0,60  | 0,23 |
| Okulärer Perfusionsdruck                                     | 0,67  | 0,56  | 0,69 |
| Augeninnendruck (IOD)                                        | 0,61  | 0,78  | 0,33 |
| Mittlere Abweichung                                          | 0,79  | 0,72  | 0,71 |
| Alter                                                        | 0,42  | 0,49  | 0,64 |
| Systolischer Blutdruck                                       | 0,66  | 0,56  | 0,73 |
| Diastolischer Blutdruck                                      | 0,82  | 0,72  | 0,84 |
| Pulsfrequenz                                                 | 0,88  | 0,83  | 0,76 |

RimBF= Blutfluss im neuroretinalen Randsaum; CupBF= Blutfluss in Exkavation; FPA= Funduspulsationsamplitude.

mittels zweier unabhängiger Methoden zur Messung okulärer hämodynamischer Parameter gezeigt werden. Mehrere Faktoren lassen vermuten, dass dieses Ergebnis durch eine direkte vasodilatatorische Wirkung von Dorzolamid bedingt wird und keine sekundäre Folge der Senkung des IOD ist. Einerseits bewirkten Dorzolamid und Timolol eine vergleichbare Senkung des IOD und eine vergleichbare Erhöhung des okulären Perfusionsdrucks, während okuläre hämodynamische Effekte nur mit dem Karboanhydrasehemmer beobachtet wurden. Andererseits zeigen die Ergebnisse unserer multiplen Regressionsanalyse, dass die Erhöhung der Perfusion unabhängig von den IOD-senkenden Wirkungen ist.

Die Relevanz unserer Ergebnisse für die Glaukomtherapie ist wesentlich von der Frage abhängig, ob der reduzierte Blutfluss in der Papille einen Faktor darstellt, der zu einem Verlust von retinalen Ganglienzellen bei Glaukomen beiträgt. Zahlreiche Studien haben gezeigt, dass der Blutfluss in der Papille bei Patienten mit Glaukom reduziert ist,<sup>19, 24-27</sup> aus Querschnittstudien lässt sich allerdings kein Zusammenhang zwischen einer reduzierten Durchblutung und der Progredienz der Krankheit ableiten. Aus den letzten Jahren liegen jedoch zunehmende Nachweise dafür vor, dass ein reduzierter okulärer Blutfluss in direktem Zusammenhang mit einem Gesichtsfeldverlust steht. In einer längerfristigen Studie an Patienten mit Normaldruckglaukom war eine verminderte Blutflussgeschwindigkeit in den retrobulbären Gefäßen mit einem Fortschreiten des Gesichtsfeldverlustes verbunden.<sup>28</sup> Dies steht in Einklang mit einer neueren retrospektiven Studie, bei der die Geschwindigkeit des Fortschreitens eines Gesichtsfeldschadens mit einer reduzierten retrobulbären Blutflussgeschwindigkeit in Verbindung stand, und zwar unabhängig vom vorbestehenden Gesichtsfeldschaden und vom IOD.<sup>29</sup> Ein signifikanter Zusammenhang zwischen dem Blutvolumen der Papille bei Bestimmung mittels Laser Doppler Flussmessung und dem Gesichtsfeldverlust bei POWG wurde vor kurzem aus einer Langzeit-Studie mit einer mittleren Beobachtungsdauer von 33 Monaten berichtet.<sup>30</sup> Zusätzlich haben zahlreiche Studien gezeigt, dass ein Glaukom nicht nur mit einem reduzierten Blutfluss in der Papille in Zusammenhang steht, sondern auch mit einer abnormalen okulären Blutflussregulation, die kaum durch eine sekundäre Reduktion des Blutflusses erklärbar ist. Die Analyse der Baseline-Blutflusswerte in der vorliegenden Studie zeigte, dass ein abnormaler Zusammenhang zwischen Blutfluss in neuroretinalem Randsaum, Exkavation und Funduspulsationsamplitude und dem systemischen Blutdruck besteht, der bei gesunden Kontrollprobanden nicht beobachtet werden kann.<sup>16</sup> Diese Studien konnten zwar keinen direkten Nachweis für einen nützlichen Behandlungseffekt im Sinne einer Verbesserung des Blutflusses in der Papille bei Patienten mit POWG erbringen, sie stellen aber eine gute Grundlage für die Charakterisierung von Antiglaukommedikamenten mit okulär hypotensiven und okulär vasodilatatorischen Eigenschaften dar.

Der genaue Mechanismus, der den vasodilatatorischen Wirkungen von Karboanhydrasehemmern in den Augengefäßen zugrunde liegt, ist noch nicht geklärt. In Kulturen der Retina von Ratten verminderten Karboanhydrasehemmer den pH im extrazellulären Raum, was mit einer Erhöhung des Durchmessers der retinalen Kapillargefäße und einer Entspannung der retinalen Perizyten verbunden war.<sup>31</sup> Intravenös verabreichtes Dorzolamid induziert Azidose von arteriellem Blut<sup>32</sup> und des extrazellulären Raumes über der Papille.<sup>33</sup> Andererseits zeigen Experimente an isolierten und vorkontrahierten bovinen Retinalarterien, dass die vasodilatatorischen Wirkungen von Dorzolamid unabhängig von Veränderungen im pH-Wert sind, da eine Dorzolamid-induzierte Dilatation auch dann beobachtet werden kann, wenn der pH-Wert

konstant gehalten wird.<sup>34</sup> Eine Aktivierung von Stickoxid dürfte keine wesentliche Rolle bei der durch Karboanhydrasehemmer bedingten Vasodilatation im Auge spielen,<sup>35</sup> und es sind daher weitere Studien erforderlich, um den zugrundeliegenden Mechanismus für die vaskulären Wirkungen der Karboanhydrasehemmer besser verstehen zu können.

Als interessante Beobachtung aus der vorliegenden Studie blieben alle okulären hämodynamischen Parameter unter Behandlung mit Timolol praktisch unverändert. Vorhergehende Berichte über die okulären hämodynamischen Wirkungen von Timolol sind widersprüchlich, was auch mit unterschiedlichen Therapieschemata, methodisch bedingten Problemen und einem mangelhaften Studiendesign in Zusammenhang stehen könnte.<sup>36-41</sup> Unsere eigenen Ergebnisse zeigen hingegen, dass eine längerfristige topische Anwendung von Timolol mit keinen relevanten okulären hämodynamischen Effekten verbunden ist.

Beide zur Bewertung der okulären Hämodynamik eingesetzten Methoden weisen bestimmte Einschränkungen auf. Beim HRF ist die Messtiefe innerhalb des Papillengewebes nicht bekannt. Außerdem ist die Reproduzierbarkeit bei dieser Methode eine wesentliche Frage,<sup>19, 20</sup> was bei Glaukompatienten ein größeres Problem darstellt als bei gesunden Kontrollen und daher zu vergleichsweise hohen Stichprobengrößen führt. Bei der Messung der Funduspulsationsamplitude wird offensichtlich nur der pulsatile Anteil des choroidalen Blutflusses gemessen. Daher sind alle Schlussfolgerungen bezüglich der pharmakodynamischen Wirkungen bei Anwendung dieser Methode entscheidend von der Annahme abhängig, dass das Verhältnis von pulsatilem zu nichtpulsatilem Blutfluss konstant ist. In der vorliegenden Studie wurden mit beiden Methoden übereinstimmende Ergebnisse beobachtet, was darauf hindeutet, dass die beobachteten Wirkungen nicht in stärkerem Ausmaß durch die Beschränkungen dieser beiden Methoden beeinflusst werden.<sup>42</sup>

Zusammenfassend kann gesagt werden, dass die Daten aus der vorliegenden Studie zeigen, dass Dorzolamid, aber nicht Timolol, den Blutfluss in der Papille und den choroidalen Blutfluss bei Patienten mit primärem Offenwinkelglaukom und okulärer Hypertension erhöht. Ob diese Wirkung mit einer Erhaltung des Gesichtsfelds bei Glaukompatienten verbunden ist, muss erst bestätigt werden.

## Danksagung

Die Autoren möchten den folgenden Ophthalmologen für die Überweisung ihrer Patienten an unsere Abteilung zur Aufnahme in die vorliegende Studie danken: Dr. Elisabeth Arock-Mettinger, Dr. Helga Azem, Dr. Alexandra Crammer, Dr. Paul Drobec, Dr. Marcela Hakl, Dr. Christine Hönigsmann, Dr. Hans Kössler, Dr. Eva Krammer, Dr. Constanze Merenda, Dr. Maria Reichel, Dr. Günther Reichelt, Dr. Karin Schmetterer, Dr. Herbert Schuster, Dr. Naresh Sheetal, Dr. Elisabeth Sienko, Dr. Eva Weingessl.

## Autorenzugehörigkeit

**G Fuchsjäger-Mayrl, B Wally, T Aggermann, J Kolodjaschna, G Weigert, E Polska, H-G Eichler, L Schmetterer**, Universitätsklinik für klinische Pharmakologie, Medizinische Universität Wien, Österreich

**G Fuchsjäger-Mayrl, G Rainer, W Buehl, C Vass**, Universitätsklinik für Ophthalmologie, Medizinische Universität Wien, Österreich  
**L Schmetterer**, Institut für Medizinische Physik, Medizinische Universität Wien, Österreich

Finanzielle Unterstützung durch eine unbeschränkte Subvention von Merck, Sharp & Dohme

## LITERATUR

- 1 **Flammer J**, Orgul S, Costa VP, et al. The impact of ocular blood flow in glaucoma. *Prog Retin Eye Res* 2002;**21**:359-93.

- 2 **Harris A**, Jonescu-Cuyppers CP. The impact of glaucoma medication on parameters of ocular perfusion. *Curr Opin Ophthalmol* 2001;**12**:131–7.
- 3 **Harris A**, Arend O, Arend S, et al. Effects of topical dorzolamide on retinal and retrobulbar hemodynamics. *Acta Ophthalmol Scand* 1996;**74**:569–72.
- 4 **Martinez A**, Gonzalez F, Capeans C, et al. Dorzolamide effect on ocular blood flow. *Invest Ophthalmol Vis Sci* 1999;**40**:1270–5.
- 5 **Harris A**, Arend O, Kagemann L, et al. Dorzolamide, visual function and ocular hemodynamics in normal-tension glaucoma. *J Ocul Pharmacol Ther* 1999;**15**:189–97.
- 6 **Harris A**, Arend O, Chung HS, et al. A comparative study of betaxolol and dorzolamide effect on ocular circulation in normal-tension glaucoma patients. *Ophthalmology* 2000;**107**:430–4.
- 7 **Harris A**, Jonescu-Cuyppers CP, Kagemann L, et al. Effect of dorzolamide timolol combination versus timolol 0.5% on ocular blood flow in patients with primary open-angle glaucoma. *Am J Ophthalmol* 2001;**132**:490–5.
- 8 **Avunduk AM**, Sari A, Akyol N, et al. The one-month effects of topical betaxolol, dorzolamide and apraclonidine on ocular blood flow velocities in patients with newly diagnosed primary open-angle glaucoma. *Ophthalmologica* 2001;**215**:361–5.
- 9 **Bernd AS**, Pillunat LE, Bohm AG, et al. Okuläre Hämodynamik und Gesichtsfeld beim Glaukom unter Dorzolamid-Therapie. *Ophthalmologie* 2001;**98**:451–5.
- 10 **Grunwald JE**, Mathur S, DuPont J. Effects of dorzolamide hydrochloride 2% on the retinal circulation. *Acta Ophthalmol* 1997;**75**:236–8.
- 11 **Pillunat LE**, Bohm AG, Koller AU, et al. Effect of topical dorzolamide on optic nerve head blood flow. *Graefes Arch Clin Exp Ophthalmol* 1999;**37**:495–500.
- 12 **Bergstrand IC**, Heijl A, Harris A. Dorzolamide and ocular blood flow in previously untreated glaucoma patients: a controlled double-masked study. *Acta Ophthalmol Scand* 2002;**80**:176–82.
- 13 **Balfour JA**, Wilde MI. Dorzolamide. A review of its pharmacology and therapeutic potential in the management of glaucoma and ocular hypertension. *Drugs Aging* 1997;**10**:384–403.
- 14 **Michelson G**, Schmauss B, Langhans MJ, et al. Principle, validity, and reliability of scanning laser Doppler flowmetry. *J Glaucoma* 1996;**5**:99–105.
- 15 **Schmetterer L**, Lexer F, Unfried C, et al. Topical measurement of fundus pulsations. *Opt Eng* 1995;**34**:711–6.
- 16 **Fuchsjäger-Mayrl G**, Wally B, Georgopoulos M, et al. Ocular blood flow and systemic blood pressure in patients with primary open-angle glaucoma and ocular hypertension. *Invest Ophthalmol Vis Sci* 2004;**45**:834–9.
- 17 **Keltner JL**, Johnson CA, Cello KF, et al. Classification of visual field abnormalities in the ocular hypertension treatment study. *Arch Ophthalmol* 2003;**121**:643–50.
- 18 **Bonner R**, Nossal R. Principles of laser-Doppler flowmetry in laser-Doppler blood flowmetry. In: Shepard AP, Öberg AP, eds. *Developments in cardiovascular medicine*. Volume 107. Boston: Kluwer Academic Publishers, 1990:17–45.
- 19 **Nicolela MT**, Hnik P, Drance SM. Scanning laser Doppler flowmetry study on retinal and optic disc blood flow in glaucomatous patients. *Am J Ophthalmol* 1996;**122**:775–83.
- 20 **Strenn K**, Menapace R, Rainer G, et al. Reproducibility and sensitivity of scanning laser Doppler flowmetry during graded changes in pO<sub>2</sub>. *Br J Ophthalmol* 1997;**81**:360–4.
- 21 **Nicolela MT**, Hnik P, Schulzer M, et al. Reproducibility of retinal and optic nerve head blood flow measurements with laser Doppler flowmetry. *J Glaucoma* 1997;**6**:157–64.
- 22 **Schmetterer L**, Dallinger S, Findl O, et al. A comparison between laser interferometric measurement of fundus pulsation and pneumotonomeric measurement of pulsatile ocular blood flow. 1. Baseline considerations. *Eye* 2000;**14**:39–45.
- 23 **Schmetterer L**, Dallinger S, Findl O, et al. A comparison between laser interferometric measurement of fundus pulsation and pneumotonomeric measurement of pulsatile ocular blood flow. 2. Effects of changes in pCO<sub>2</sub> and pO<sub>2</sub> and of isoproterenol. *Eye* 2000;**14**:46–52.
- 24 **Grunwald JE**, Piltz J, Hariprasad SM, et al. Optic nerve and choroidal circulation in glaucoma. *Invest Ophthalmol Vis Sci* 1998;**39**:2329–36.
- 25 **Kerr J**, Nelson P, O'Brien C. A comparison of ocular blood flow in untreated primary open-angle glaucoma and ocular hypertension. *Am J Ophthalmol* 1998;**126**:42–51.
- 26 **Michelson G**, Langhans MJ, Groh MJ. Perfusion of the juxtapapillary retina and the neuroretinal rim area in primary open angle glaucoma. *J Glaucoma* 1996;**5**:91–8.
- 27 **Findl O**, Rainer G, Dallinger S, et al. Assessment of optic disc blood flow in patients with open angle glaucoma. *Am J Ophthalmol* 2000;**130**:589–96.
- 28 **Yamaaki Y**, Drance SM. The relationship between progression of visual field defects and retrobulbar circulation in patients with glaucoma. *Am J Ophthalmol* 1997;**124**:287–95.
- 29 **Saltimis M**, Orgul S, Doubler B, et al. Rate of progression of glaucoma correlates with retrobulbar circulation and intraocular pressure. *Am J Ophthalmol* 2003;**135**:664–9.
- 30 **Zink JM**, Grunwald JE, Piltz-Seymour J, et al. Association between lower optic nerve laser Doppler blood volume measurements and glaucomatous visual field progression. *Br J Ophthalmol* 2003;**87**:487–91.
- 31 **Reber F**, Gersch U, Funk RW. Blockers of carbonic anhydrase can cause increase of retinal capillary diameter, decrease of extracellular and increase of intracellular pH in rat retinal organ culture. *Graefes Arch Clin Exp Ophthalmol* 2003;**41**:140–8.
- 32 **Stefansson E**, Jensen PK, Eysteinnsson T, et al. Optic nerve oxygen tension in pigs and the effect of carbonic anhydrase inhibitors. *Invest Ophthalmol Vis Sci* 1999;**40**:2756–61.
- 33 **Pedersen DB**, Eysteinnsson T, Kiilgaard JF, et al. The effect of intravenous administration of carbonic anhydrase inhibitors and NH<sub>4</sub>Cl on pre-optic pH. *Invest Ophthalmol Vis Sci* 2001;**42**: ARVO abstract, 4449.
- 34 **Josefsson A**, Sigurdsson SB, Bang K, et al. Dorzolamide induces vasodilatation in isolated pre-contracted bovine retina arteries. *Exp Eye Res* 2004;**78**:215–21.
- 35 **Kiss B**, Dallinger S, Findl O, et al. Acetazolamide-induced cerebral and ocular vasodilation in man is independent of nitric oxide. *Am J Physiol* 1999;**276**:R1661–7.
- 36 **Grunwald JE**. Effect of topical timolol on the human retinal circulation. *Invest Ophthalmol Vis Sci* 1986;**27**:1713–8.
- 37 **Boles Carenini B**, Brogliatti B, Boles Carenini A. Pulsatile ocular blood flow and antiglaucoma drugs. *New Trends Ophthalmol* 1992;**7**:195–200.
- 38 **Boles Carenini A**, Sibour G, Boles Carenini B. Differences in long term effect of timolol and betaxolol on the pulsatile ocular blood flow. *Surv Ophthalmol* 1994;**38**(Suppl):S118–24.
- 39 **Yoshida A**, Feke GT, Ogasawara H, et al. Effect of timolol on human retinal, choroidal and optic nerve head circulation. *Ophthalmic Res* 1991;**23**:162–70.
- 40 **Harris A**, Spaeth GL, Sergott RC, et al. Retrobulbar arterial hemodynamic effects of betaxolol and timolol in normal-tension glaucoma. *Am J Ophthalmol* 1995;**20**:168–75.
- 41 **Schmetterer L**, Strenn K, Findl O, et al. Effects of antiglaucoma drugs on ocular hemodynamics in healthy volunteers. *Clin Pharmacol Ther* 1997;**61**:583–95.
- 42 **Polska E**, Polak K, Luksch A, et al. Twelve hour reproducibility of choroidal blood flow parameters in healthy subjects. *Br J Ophthalmol* 2004;**88**:533–7.
